# Supplementary material for: Convergence and Divergence in the Evolution of Cat Skulls: Temporal and Spatial Patterns of Morphological Diversity
Source: PLoS One. 2012 Jul 6;7(7):e39752. doi: 10.1371/journal.pone.0039752 (PMC3391202; doi:10.1371/journal.pone.0039752)
Supplement: Table S3 — Data matrix for cladistic analysis. Character numbers (columns) correspond to character descriptions given in Text S1. The supraspecific OTU, Felinae, is scored using the five feline taxa, Felis silvestris, Leopardus pardalis, Puma yagouaroundi, Panthera leo, and Panthera tigris, according to the following scheme: Characters are scored such that if the sum of the five taxa for any given character = 0, then score for FELINAE = 0; if sum = 1, then FELINAE = 0; if sum = 2, then FELINAE = [0 1]; if sum = 3, then FELINAE = [0 1]; if sum = 4, then FELINAE = 1; and if sum = 5, then FELINAE = 1. The above scheme is suitable for binary character scorings (0 or 1), so excludes character 18 in which 4 out of 5 taxa are scored 2, thus FELINAE = 2. Character scores for each feline taxa are given separately from the main character matrix. Matrix is formatted for TNT [25]. (XLS) [file pone.0039752.s012.xls]

## Sheet: TableS3
Table S3. Data matrix for cladistic analysis.
Taxon	1	2	3	4	5	6	7	8	9	10	11	12	13	14	15	16	17	18	19	20	21	22	23	24	25	26	27	28	29	30	31	32	33	34	35	36	37	38	39	40	41	42	43	44
Proailurus_lemanensis	0	?	0	0	0	0	0	0	0	0	0	0	0	0	0	0	0	0	?	?	0	0	0	0	0	0	?	?	?	0	0	0	?	?	0	0	?	?	0	0	0	0	0	0
Hyperailurictis_validus	0	0	1	0	0	0	1	0	0	0	0	0	0	0	1	1	1	1	0	0	0	0	?	1	0	0	0	0	0	?	0	0	0	0	0	0	1	0	1	0	1	0	0	0
F:AM-62192	?	0	1	1	0	0	1	0	1	1	0	?	?	?	?	?	?	?	0	0	0	?	?	1	0	0	?	?	?	?	?	?	0	0	?	0	0	?	0	0	0	0	?	?
Metailurus_parvulus	?	0	1	0	0	0	1	0	0	1	0	0	1	1	1	1	1	1	0	0	1	0	0	2	0	0	0	?	0	0	0	1	0	1	0	0	0	1	1	1	0	0	0	0
Dinofelis_cristata	?	0	1	1	1	0	1	0	0	1	0	?	?	?	?	?	?	?	0	0	1	1	0	1	0	0	?	?	?	?	?	?	0	0	1	0	1	1	1	1	?	0	?	?
Dinofelis_F:AM-50446	0	0	1	1	1	0	1	0	0	1	1	?	?	?	?	?	?	?	0	0	1	1	0	2	0	0	?	?	?	?	?	?	0	0	1	0	1	1	1	1	?	0	?	?
Dinofelis_F:AM-50445	0	0	1	1	1	0	1	0	0	1	?	?	?	?	?	?	?	?	0	0	1	1	0	2	0	0	?	?	?	?	?	?	0	1	1	0	?	1	1	1	?	0	?	?
AMNH_105446	0	0	1	1	0	0	1	1	1	1	?	?	?	?	?	?	?	?	1	0	2	1	2	2	1	0	?	?	?	?	?	?	0	1	1	0	?	?	?	0	?	1	?	?
Megantereon_falconeri	0	0	1	1	0	1	0	1	0	1	[0 1]	1	1	1	1	1	1	2	0	0	2	1	2	2	1	2	0	0	0	1	0	1	0	1	1	1	?	?	3	2	?	2	2	2
Smilodon_fatalis	1	0	1	1	1	0	0	1	?	1	0	1	1	-	-	1	1	2	2	0	1	1	1	2	1	2	0	1	0	1	1	1	0	2	1	1	1	1	3	2	1	2	1	2
Xenosmilus_hodsonae	2	1	1	0	0	1	0	1	?	1	-	1	1	-	-	1	1	2	2	1	2	1	0	2	2	2	1	2	1	1	1	1	1	2	0	1	?	?	2	1	?	2	2	2
Homotherium_crusafonti	2	1	1	0	0	1	0	1	?	1	?	?	?	?	?	?	?	?	2	1	2	1	1	2	2	1	?	?	?	?	?	?	1	2	0	1	?	0	?	1	1	2	?	?
F:AM-50462	?	1	1	1	0	0	1	1	0	1	1	?	?	?	?	?	?	?	1	1	2	?	?	2	1	2	?	?	?	?	?	?	0	2	1	1	1	1	2	1	1	2	?	?
Homotherium_nestianus	2	1	1	1	1	1	0	1	1	1	?	1	1	0	0	1	1	2	2	1	2	1	1	2	2	2	1	2	1	1	0	1	0	2	0	1	1	1	2	1	1	2	1	2
FELINAE	0	0	1	0	[0 1]	0	[0 1]	0	1	1	0	0	1	1	1	1	1	2	0	0	0	0	0	0	0	0	0	0	0	0	0	0	0	0	0	0	0	[0 1]	[0 1]	0	0	0	0	0
Character scores for some feline taxa. Scores of these taxa form the basis of FELINAE in the cladistic matrix above*.
Felis_silvestris	0	0	1	0	0	0	0	0	0	0	0	0	1	0	0	0	0	2	0	0	0	0	[0 1]	0	0	0	0	0	0	0	0	0	0	0	0	0	0	?	0	0	0	0	0	0
Leopardus_pardalis	0	0	1	0	0	1	1	0	1	1	0	0	1	1	1	1	1	2	0	0	0	0	0	0	0	0	0	0	0	0	0	0	0	0	0	0	0	0	0	0	0	0	0	0
Puma_yagouaroundi	0	0	1	0	0	0	0	0	?	1	0	0	1	?	?	1	1	2	0	0	0	0	0	1	0	0	0	0	0	0	0	0	0	0	0	0	0	1	0	0	0	0	0	0
Panthera_leo	0	0	1	0	1	0	1	0	1	1	0	0	1	1	1	1	1	2	0	0	0	0	0	0	0	0	0	0	0	0	0	0	0	0	0	0	1	0	1	0	0	0	0	0
Panthera_tigris	0	0	1	0	1	0	1	0	1	1	0	0	1	1	1	1	1	1	0	0	0	0	0	0	0	0	0	0	0	0	0	0	0	0	1	0	0	1	1	0	0	0	0	0
* Characters are scored such that if the sum of the five taxa for any given character = 0, then score for FELINAE = 0; if sum = 1, then FELINAE = 0; if sum = 2, then FELINAE = [0 1]; if sum = 3, then FELINAE = [0 1]; if sum = 4, then FELINAE = 1; and if sum = 5, then FELINAE = 1.
